# Supplementary material
Source: Springer Nature journal article supplement (https://www.springermedizin.de/resource/supplementary/13741_2012_6_MOESM5_ESM.pdf/9681988)
Supplement: MOESM5 [file 9681988]

**Table 1. Baseline characteristics**

|                              | <b>Group 1</b>       | <b>Group 2</b>        |
|------------------------------|----------------------|-----------------------|
|                              | <b>N=12</b>          | <b>N=12</b>           |
| <b>Age (year), mean (SD)</b> | <b>80.2(+/- 5.1)</b> | <b>76.0(+/- 13.7)</b> |
| <b>Female/Male</b>           | <b>10/2</b>          | <b>6/6</b>            |
| <b>FNF side left:right</b>   | <b>4/8</b>           | <b>8/4</b>            |
